# Supplementary material for: Predictive value of early magnetic resonance imaging measures is differentially affected by the dose of interferon beta-1a given subcutaneously three times a week: an exploratory analysis of the PRISMS study
Source: Springer Nature journal article supplement (doi:10.1186/s12883-018-1066-8), 2018-05-11
Supplement: MOESM2 [file 15756978]

**Additional file 2**

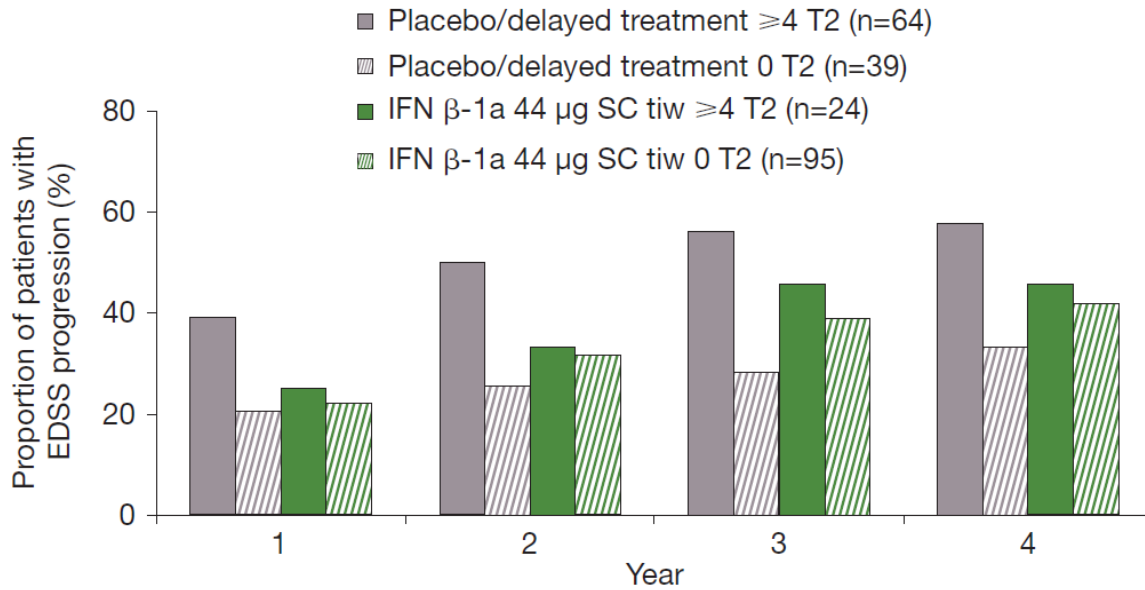

**Supplementary Fig. 2** Proportion with EDSS progression at each year in the placebo/delayed treatment and IFN β-1a 44 μg SC tiw groups by ≥4 versus 0 active T2 lesions at 6 months.

EDSS: Expanded Disability Status Scale; IFN β-1a: interferon beta-1a; SC: subcutaneously; tiw: three times weekly.
