# Supplementary material for: Predictive value of early magnetic resonance imaging measures is differentially affected by the dose of interferon beta-1a given subcutaneously three times a week: an exploratory analysis of the PRISMS study
Source: Springer Nature journal article supplement (doi:10.1186/s12883-018-1066-8), 2018-05-11
Supplement: MOESM4 [file 15756978]

Additional file 4

A)

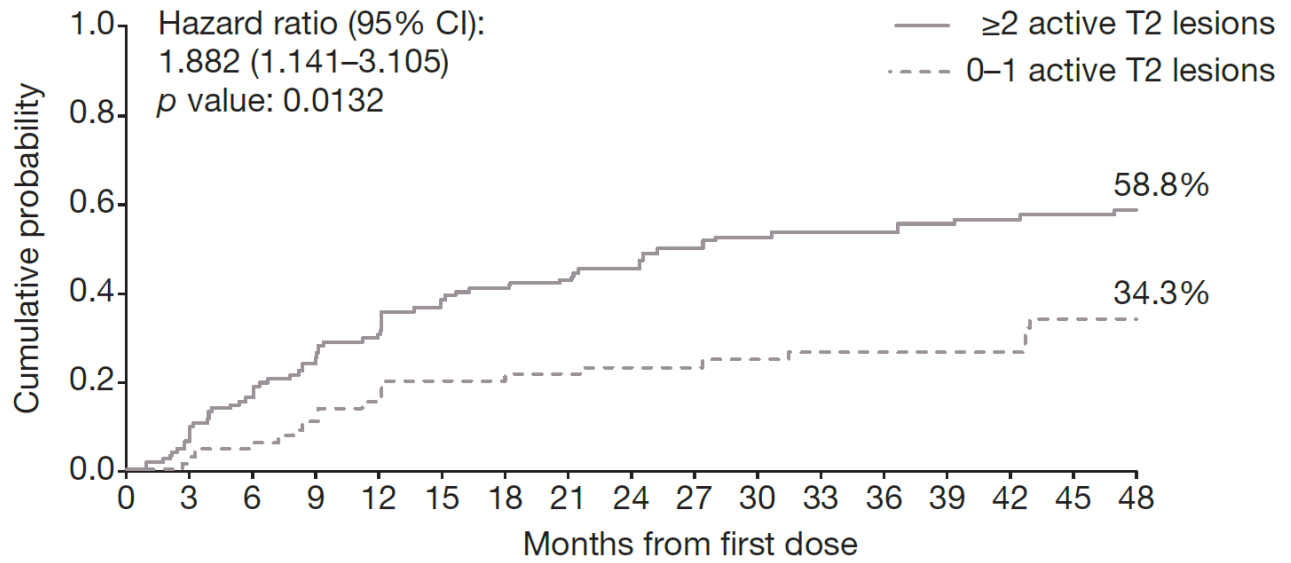

B)

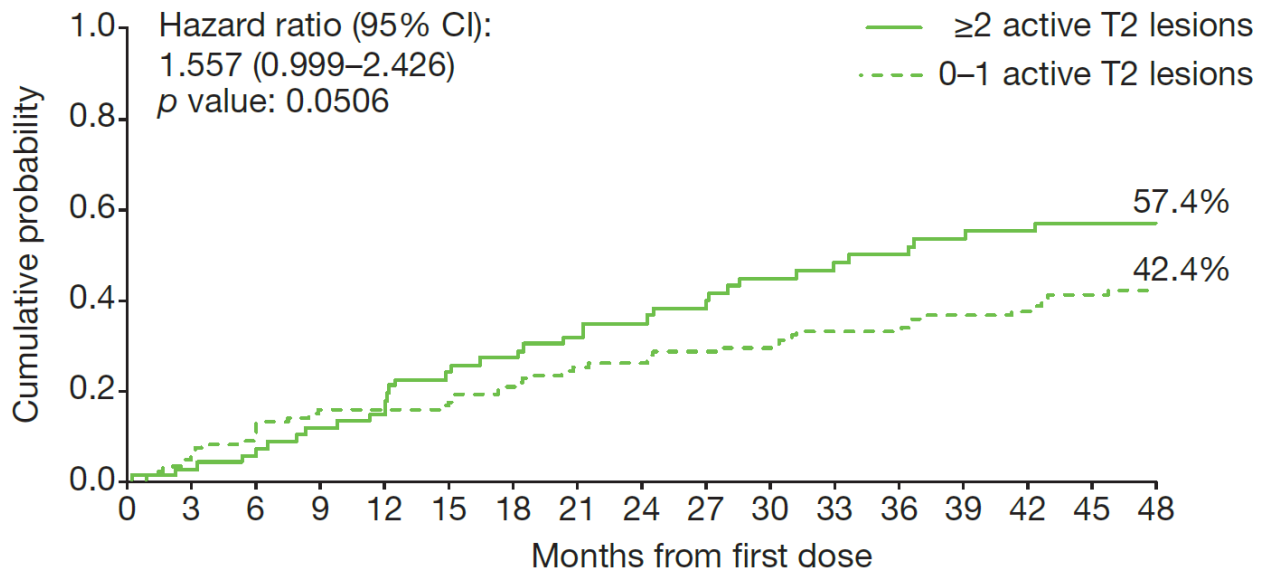

C)

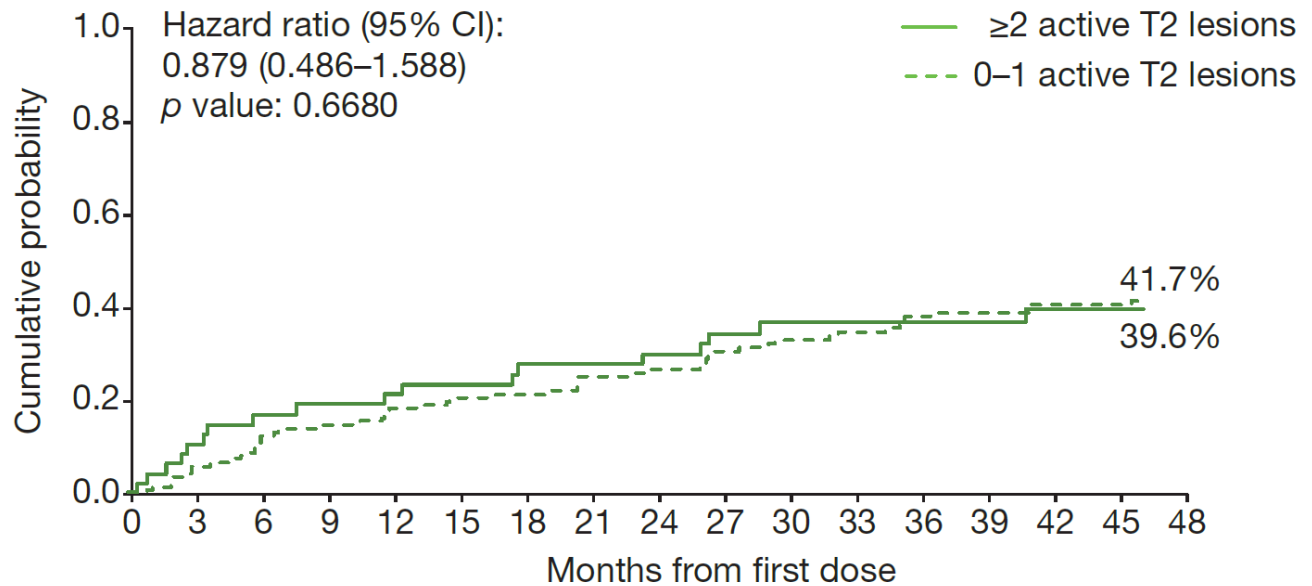

**Supplementary Fig. 3** Time to sustained EDSS progression by  $\geq 2$  versus 0–1 active T2 lesions at 6 months.

(a) Placebo/delayed treatment group; (b) IFN  $\beta$ -1a 22  $\mu$ g SC tiw group; (c) IFN  $\beta$ -1a 44  $\mu$ g SC tiw group.

A Cox proportional hazards model, adjusted for number of relapses in the previous 2 years, age, baseline EDSS score, and baseline burden of disease, was used to estimate hazard ratios and *p* values. *p* values are for time to first progression over 4 years.

CI: confidence interval; EDSS: Expanded Disability Status Scale; IFN  $\beta$ -1a: interferon beta-1a; SC: subcutaneously; tiw: three times weekly.
