# Supplementary material for: Predictive value of early magnetic resonance imaging measures is differentially affected by the dose of interferon beta-1a given subcutaneously three times a week: an exploratory analysis of the PRISMS study
Source: Springer Nature journal article supplement (doi:10.1186/s12883-018-1066-8), 2018-05-11
Supplement: MOESM5 [file 15756978]

**Additional file 5**

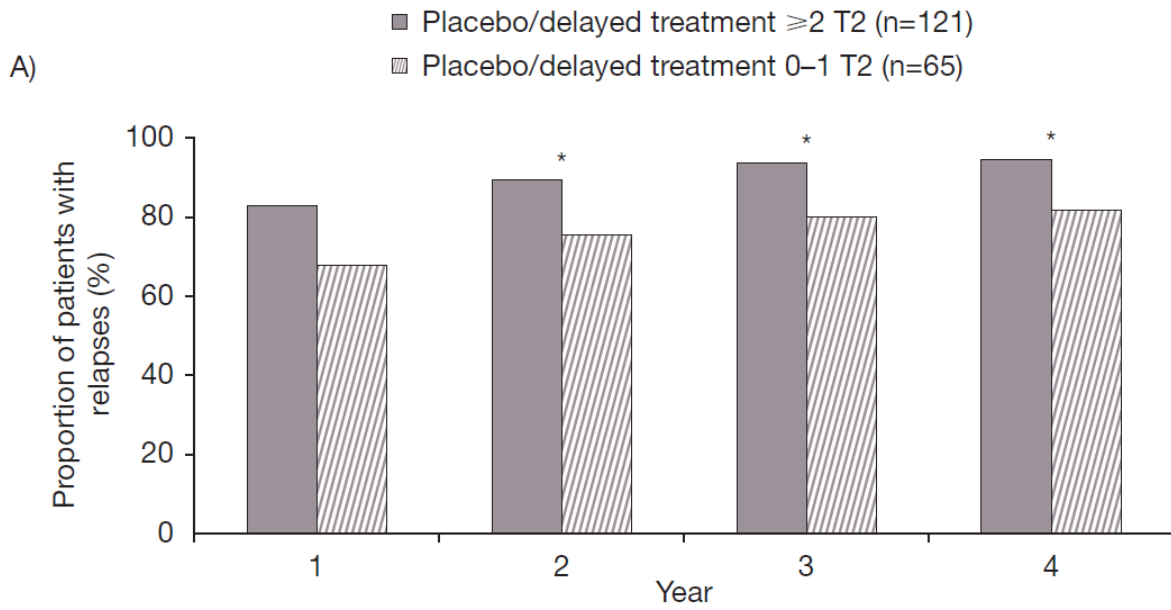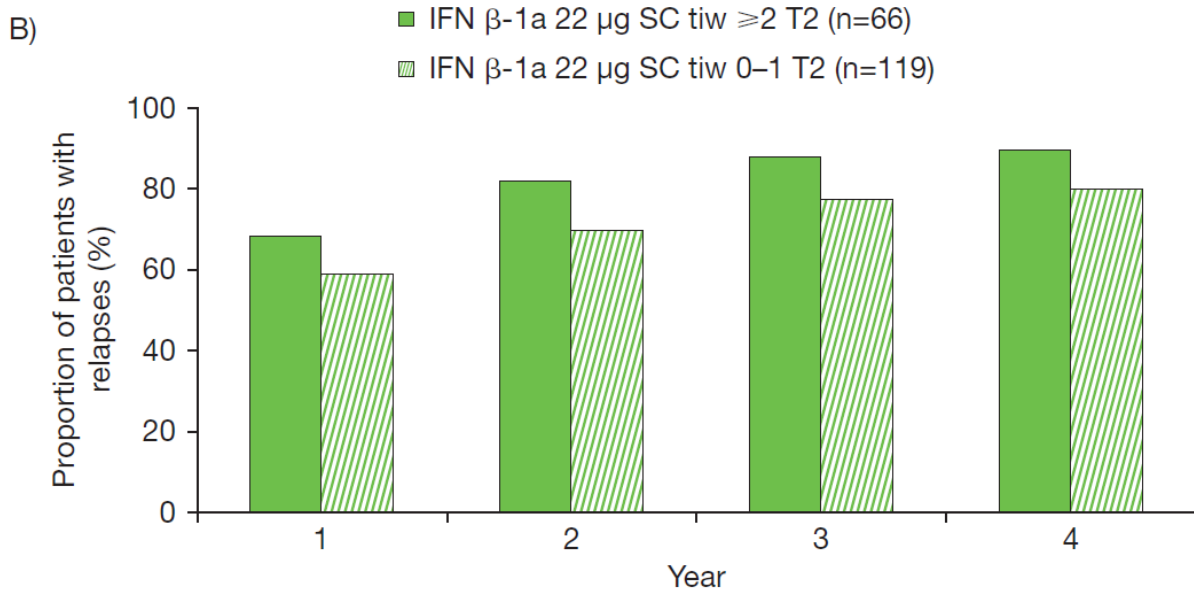

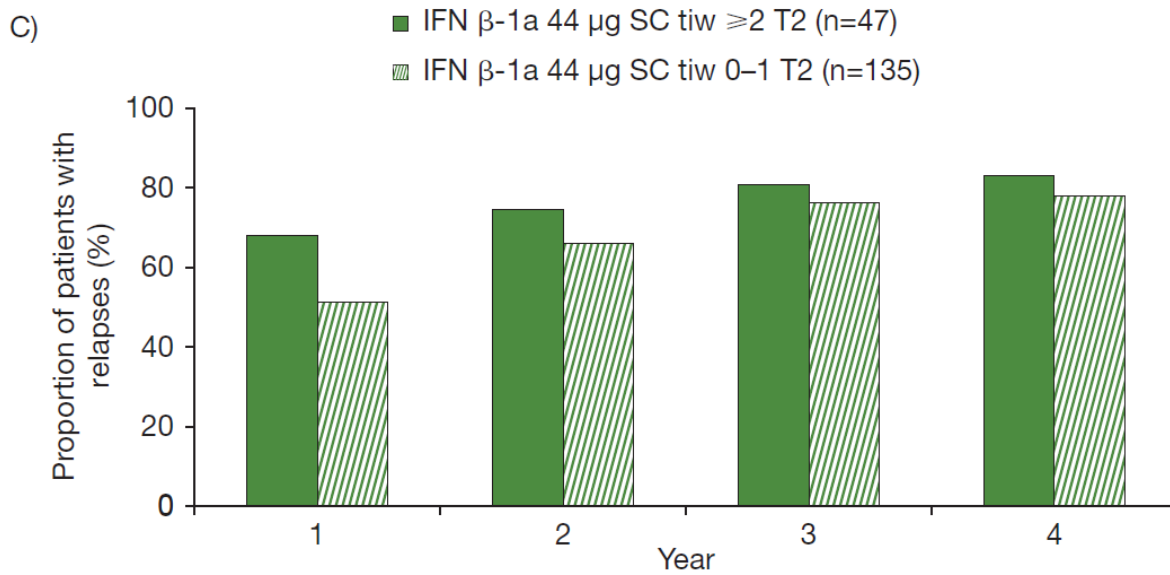

**Supplementary Fig. 4** Proportion relapsed at each year by  $\geq 2$  versus 0–1 active T2 lesions at 6 months. (a) Placebo/delayed treatment group; (b) IFN  $\beta$ -1a 22  $\mu$ g SC tiw group; (c) IFN  $\beta$ -1a 44  $\mu$ g SC tiw group.  $p$  values indicate differences between patients with differing lesion loads at 6 months within the treatment group. No statistically significant differences were seen in the IFN  $\beta$ -1a SC tiw groups. Values were calculated with a logistic regression model with predictor ( $\geq 2$  vs 0–1 T2 lesions) as a fixed effect; number of relapses within previous 2 years, age, baseline EDSS score, and baseline burden of disease were independent variables, and  $p$  values were calculated for the predictive effect of T2 lesion subgroups. \* $p < 0.05$ .

EDSS: Expanded Disability Status Scale; IFN  $\beta$ -1a: interferon beta-1a; SC: subcutaneously; tiw: three times weekly.
